# Supplementary material
Source: ML conference proceedings conference paper supplement (https://proceedings.neurips.cc/paper_files/paper/2017/hash/94b5bde6de888ddf9cde6748ad2523d1-Abstract.html)
Supplement: Supplementary file [file 94b5bde6de888ddf9cde6748ad2523d1-Supplemental.zip]

---

# Causal Effect Inference with Deep Latent-Variable Models

---

**Christos Louizos**

University of Amsterdam  
TNO Intelligent Imaging  
c.louizos@uva.nl

**Uri Shalit**

New York University  
CIMS  
uas1@nyu.edu

**Joris Mooij**

University of Amsterdam  
j.m.mooij@uva.nl

**David Sontag**

Massachusetts Institute of Technology  
CSAIL & IMES  
dsontag@csail.mit.edu

**Richard Zemel**

University of Toronto  
CIFAR\*  
zemel@cs.toronto.edu

**Max Welling**

University of Amsterdam  
CIFAR\*  
m.welling@uva.nl

## Appendix

### A. Simple example where one should not adjust for proxy variables

Let  $\mathbf{Z}, \mathbf{X}, \mathbf{t}, \mathbf{y}$  all be binary variables following the graphical model in Figure 1(a). Assume the following model:

1.  $p(\mathbf{Z} = 1) = p(\mathbf{Z} = 0) = 0.5$ .
2.  $p(\mathbf{X} = 1|\mathbf{Z} = 1) = p(\mathbf{X} = 0|\mathbf{Z} = 0) = \rho_x$ .
3.  $p(\mathbf{t} = 1|\mathbf{Z} = 1) = p(\mathbf{t} = 0|\mathbf{Z} = 0) = \rho_t$ .
4.  $\mathbf{y} = \mathbf{t} \oplus \mathbf{Z}$  ( $\mathbf{y}$  is deterministic)

We will look at the quantity  $p(\mathbf{y}|\text{do}(\mathbf{t} = 1))$  and show that one should not simply adjust for  $\mathbf{X}$  when computing it. We have the following identities:

$$\begin{aligned} p(\mathbf{y} = 1|\text{do}(\mathbf{t} = 1)) &= \\ \sum_{\mathbf{z}} p(\mathbf{y} = 1|\text{do}(\mathbf{t} = 1), \mathbf{Z} = \mathbf{z})p(\mathbf{Z} = \mathbf{z}|\text{do}(\mathbf{t} = 1)) &= \\ \sum_{\mathbf{z}} p(\mathbf{y} = 1|\mathbf{t} = 1, \mathbf{Z} = \mathbf{z})p(\mathbf{Z} = \mathbf{z}|\mathbf{t} = 1) &= \\ \sum_{\mathbf{z}} p(\mathbf{y} = 1|\mathbf{t} = 1, \mathbf{Z} = \mathbf{z})p(\mathbf{Z} = \mathbf{z}) &= \\ p(\mathbf{z} = 0) &= 0.5. \end{aligned}$$

---

\*Canadian Institute For Advanced Research

The covariate adjustment formula if we treated  $\mathbf{X}$  as if it's the only confounder:

$$\begin{aligned}
p^{\text{wrong}}(\mathbf{y} = 1 | do(\mathbf{t} = 1)) &= \\
\sum_{\mathbf{x}} p(\mathbf{y} = 1 | \mathbf{t} = 1, \mathbf{X} = \mathbf{x}) p(\mathbf{X} = \mathbf{x}) &= \\
0.5 \cdot (p(\mathbf{y} = 1 | \mathbf{t} = 1, \mathbf{x} = 0) + p(\mathbf{y} = 1 | \mathbf{t} = 1, \mathbf{x} = 1)) &= \\
0.5 \cdot \frac{p(\mathbf{t} = 1 | \mathbf{z} = 0) p(\mathbf{x} = 0 | \mathbf{z} = 0) p(\mathbf{z} = 0)}{p(\mathbf{t} = 1, \mathbf{x} = 0 | \mathbf{z} = 0) p(\mathbf{z} = 0) + p(\mathbf{t} = 1, \mathbf{x} = 0 | \mathbf{z} = 1) p(\mathbf{z} = 1)} + \\
0.5 \cdot \frac{p(\mathbf{t} = 1 | \mathbf{z} = 0) p(\mathbf{x} = 1 | \mathbf{z} = 0) p(\mathbf{z} = 0)}{p(\mathbf{t} = 1, \mathbf{x} = 1 | \mathbf{z} = 0) p(\mathbf{z} = 0) + p(\mathbf{t} = 1, \mathbf{x} = 1 | \mathbf{z} = 1) p(\mathbf{z} = 1)} = \\
0.5 \cdot \left( \frac{(1 - \rho_t) \rho_x}{(1 - \rho_t) \rho_x + \rho_t (1 - \rho_x)} + \frac{(1 - \rho_t) (1 - \rho_x)}{(1 - \rho_t) (1 - \rho_x) + \rho_t \rho_x} \right).
\end{aligned}$$

A short inspection shows that we obtain the correct answer,  $p^{\text{wrong}}(\mathbf{y} = 1 | do(\mathbf{t} = 1)) = 0.5$ , exactly under one of the following two conditions:

1.  $\rho_t = 0.5$ , i.e. treatment is assigned randomly.
2.  $\rho_x = 0$  or  $\rho_x = 1$ , i.e.  $\mathbf{X}$  is exactly equal to  $\mathbf{Z}$  or  $1 - \mathbf{Z}$ , and thus is a perfect proxy for  $\mathbf{Z}$ .

The crucial misstep in  $p^{\text{wrong}}$  above is the fact that  $p(\mathbf{y} = 1 | do(\mathbf{t} = 1), \mathbf{x}) \neq p(\mathbf{y} = 1 | \mathbf{t} = 1, \mathbf{x})$ , while on the other hand  $p(\mathbf{y} = 1 | do(\mathbf{t} = 1), \mathbf{z}) = p(\mathbf{y} = 1 | \mathbf{t} = 1, \mathbf{z})$ .

We note that because of the symmetry in the conditional distributions  $p(\mathbf{X} | \mathbf{Z} = 1)$  and  $p(\mathbf{X} | \mathbf{Z} = 0)$ , we will actually have that:

$$p^{\text{wrong}}(\mathbf{y} = 1 | do(\mathbf{t} = 1)) - p^{\text{wrong}}(\mathbf{y} = 1 | do(\mathbf{t} = 0)) = p(\mathbf{y} = 1 | do(\mathbf{t} = 1)) - p(\mathbf{y} = 1 | do(\mathbf{t} = 0)).$$

It is straightforward to show that this situation does not happen once we set different values for the two conditional distributions of  $p(\mathbf{X} | \mathbf{Z} = 1)$  and  $p(\mathbf{X} | \mathbf{Z} = 0)$ , in which case both  $p^{\text{wrong}}(\mathbf{y} = 1 | do(\mathbf{t})) \neq p(\mathbf{y} = 1 | do(\mathbf{t}))$  for  $\mathbf{t} = 0, 1$ , and:

$$p^{\text{wrong}}(\mathbf{y} = 1 | do(\mathbf{t} = 1)) - p^{\text{wrong}}(\mathbf{y} = 1 | do(\mathbf{t} = 0)) \neq p(\mathbf{y} = 1 | do(\mathbf{t} = 1)) - p(\mathbf{y} = 1 | do(\mathbf{t} = 0)).$$
